# Supplementary material for: Analysing surface energy balance closure and partitioning over a semi-arid savanna FLUXNET site in Skukuza, Kruger National Park, South Africa
Source: Copernicus journal article supplement (doi:10.5194/hess-21-3401-2017), 2017-07-10
Supplement: Supplementary file 1 [file hess-21-3401-2017-supplement.zip]

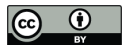

*Supplement of*

**Analysing surface energy balance closure and partitioning over a semi-arid savanna FLUXNET site in Skukuza, Kruger National Park, South Africa**

**Nobuhle P. Majozi et al.**

*Correspondence to:* Nobuhle P. Majozi ([nmajozi@csir.co.za](mailto:nmajozi@csir.co.za))

- [hess-21-3401-2017-supplement-title-page.pdf](#)
- [Copy of Skukuza\\_flux\\_data.xlsx](#)

The copyright of individual parts of the supplement might differ from the CC BY 3.0 License.
